# Supplementary material for: p38-TFEB pathways promote microglia activation through inhibiting CMA-mediated NLRP3 degradation in Parkinson's disease
Source: PubMed Central journal article supplement (PMC8686293; doi:10.1186/s12974-021-02349-y), 2021-12-20

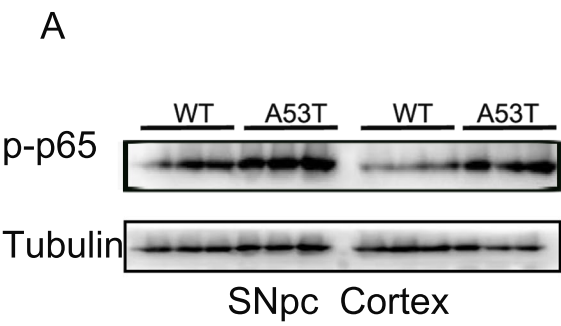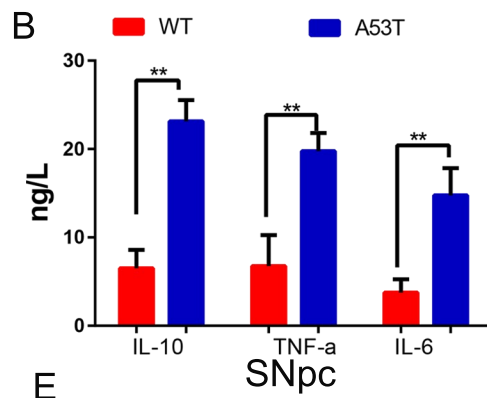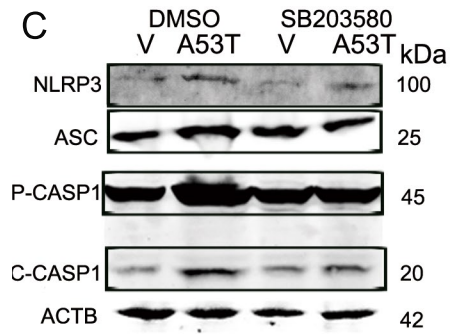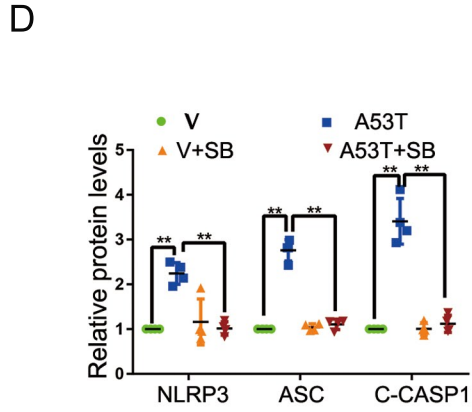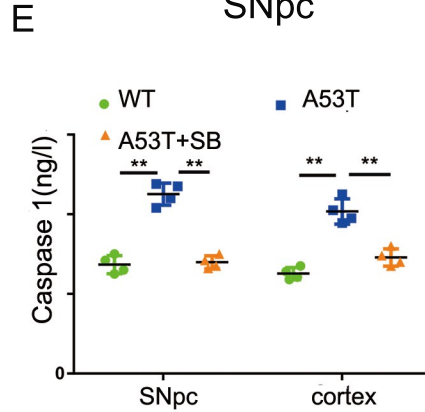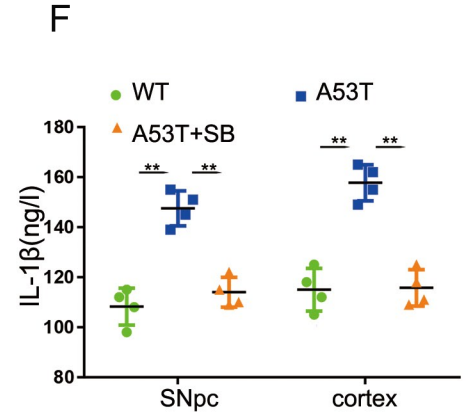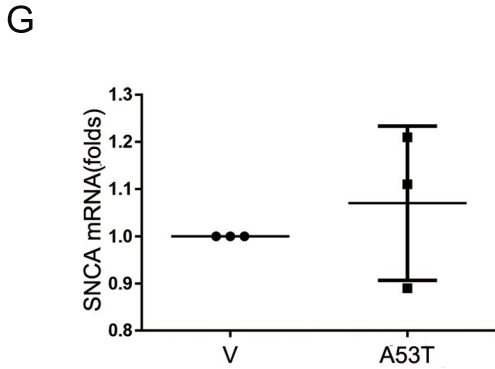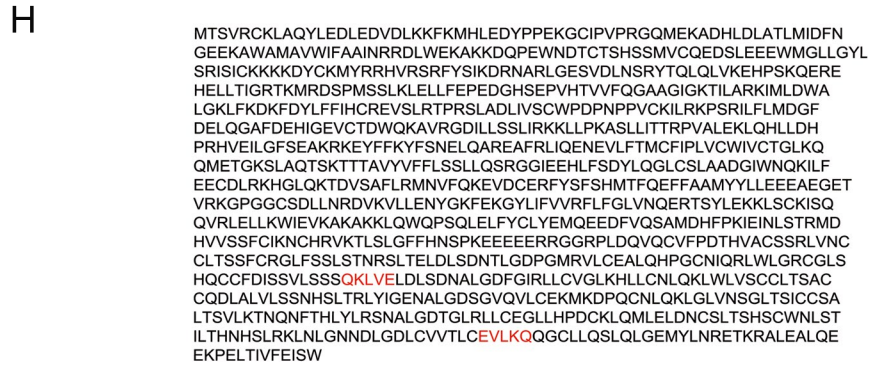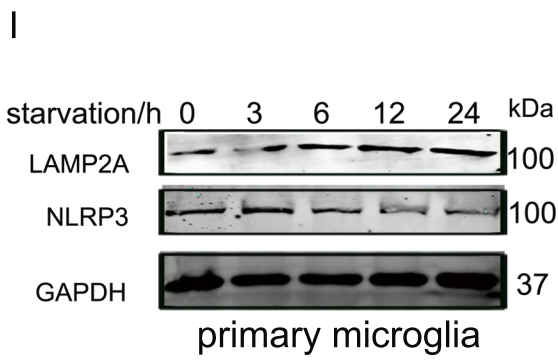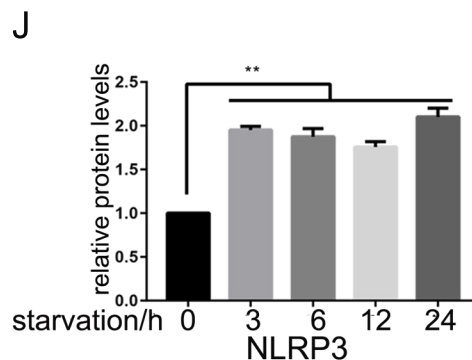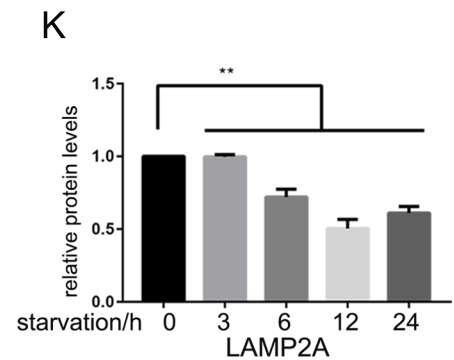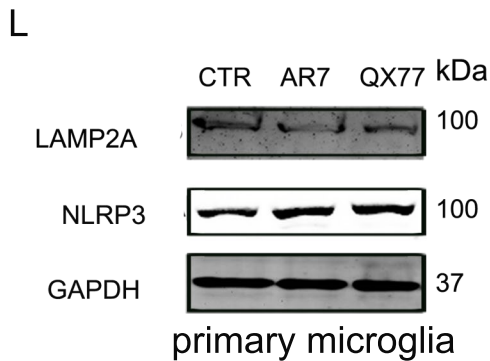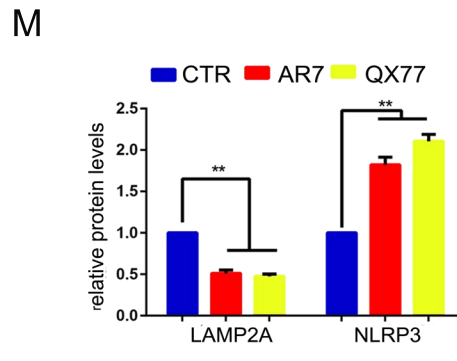

Supplement: 12974_2021_2349_MOESM2_ESM.pdf [file 12974_2021_2349_MOESM2_ESM.pdf]
